# Supplementary material for: DNA-Based Electrodes and Computational Approaches on the Intercalation Study of Antitumoral Drugs
Source: MDPI journal article supplement (doi:10.3390/molecules26247623), 2021-12-16
Supplement: s1 [file s1]

## SUPPORT INFORMATION

**Table S1.** Docking scores obtained with B-DNA dodecamer and DNA hexamer structures.

| Drug         | B-DNA dodecamer |                       | DNA hexamer  |                       |
|--------------|-----------------|-----------------------|--------------|-----------------------|
|              | Glide Emodel    | GlideScore (kcal/mol) | Glide Emodel | GlideScore (kcal/mol) |
| Doxorubicin  | -66.10          | -8.83                 | -79.26       | -10.33                |
| Daunorubicin | -61.83          | -6.67                 | -73.38       | -8.86                 |
| Idarubicin   | -79.16          | -7.19                 | -79.47       | -10.22                |
| Dacarbazine  | -42.29          | -1.84                 | -44.14       | -3.81                 |
| Mitoxantrone | -112.43         | -10.89                | -100.57      | -11.88                |
| Methotrexate | -65.14          | -0.99                 | -45.68       | -8.82                 |
